# Supplementary material
Source: Springer Nature journal article supplement (https://www.springermedizin.de/resource/supplementary/12889_2012_5336_MOESM1_ESM.pdf/9495124)
Supplement: MOESM1 [file 9495124]

9003 publications were identified

8854 excluded after screening the titles

149 full journal articles were retrieved

**88 Were excluded after reviewing the abstracts**

- 24 Were qualitative studies
- 18 Were reviews
- 17 Compared HIV+ to HIV-
- 4 Were about care during pregnancy
- 4 Compared among sero-dicordants
- 2 Were letters
- 3 Were duplicates
- 16 Were not directly related to this topic

61 articles accepted for detail review

**41 were excluded following detailed review**

- 34 were non-comparative studies
- 4 were fertility desire discussion with health providers
- 3 were about sero-discordant

20 were included for this meta-analysis
